# Supplementary material for: Suppression of Choroidal Neovascularization and Fibrosis by a Novel RNAi Therapeutic Agent against (Pro)renin Receptor
Source: PubMed Central journal article supplement (PMC6599885; doi:10.1016/j.omtn.2019.05.012), 2019-05-28
Supplement: mmc1.pdf [file mmc1.pdf]

**OMTN, Volume 17**

**Supplemental Information**

**Suppression of Choroidal Neovascularization  
and Fibrosis by a Novel RNAi Therapeutic  
Agent against (Pro)renin Receptor**

**Ye Liu, Atsuhiko Kanda, Di Wu, Erdal Tan Ishizuka, Satoru Kase, Kousuke Noda, Atsuhiko Ichihara, and Susumu Ishida**

## Supplemental information

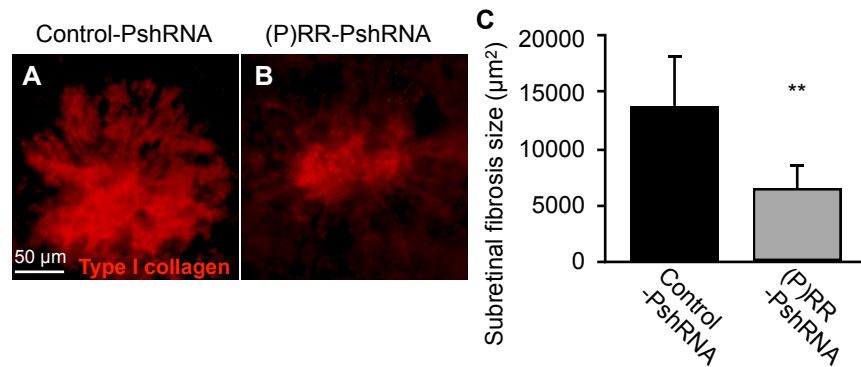

### Figure S1. Suppression of subretinal fibrosis at 21 days after laser photocoagulation by (P)RR-PshRNA

(A, B) Representative micrographs of subretinal fibrosis lesions (type I collagen, *red*) in the RPE-choroid flat mounts at post-laser day 21 from mice treated with 100 pmol control-PshRNA (A) or (P)RR-PshRNA (B). Scale bar, 50 µm. (C) Quantification analysis of the size of subretinal fibrosis [control-PshRNA = 13,695 ± 4,566 µm<sup>2</sup>, (P)RR-PshRNA = 6,381 ± 2,236 µm<sup>2</sup>]. \*\**p* < 0.01 (n = 5).

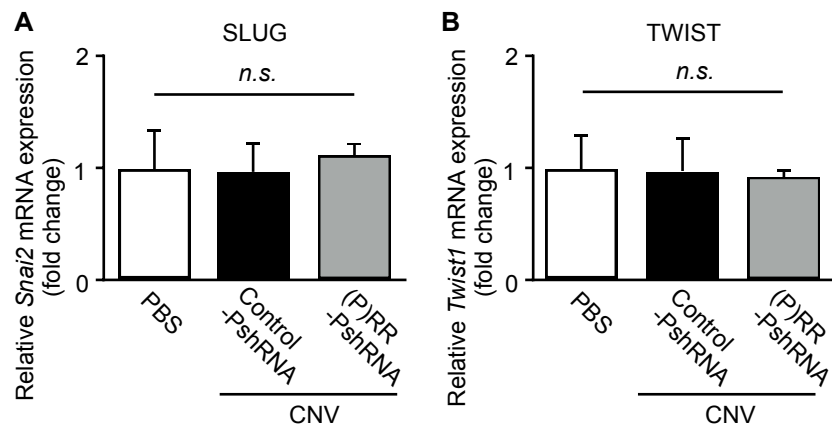

**Figure S2. Neither SNAI2 nor TWIST1 is associated with CNV induction in mice**

(A, B) Relative mRNA expression levels of *Snai2* (A) and *Twist1* (B) in the RPE-choroid complex from untreated normal mice (control) and CNV mice treated with 100 pmol control-PshRNA or (P)RR-PshRNA. n.s., not significant (n = 6).

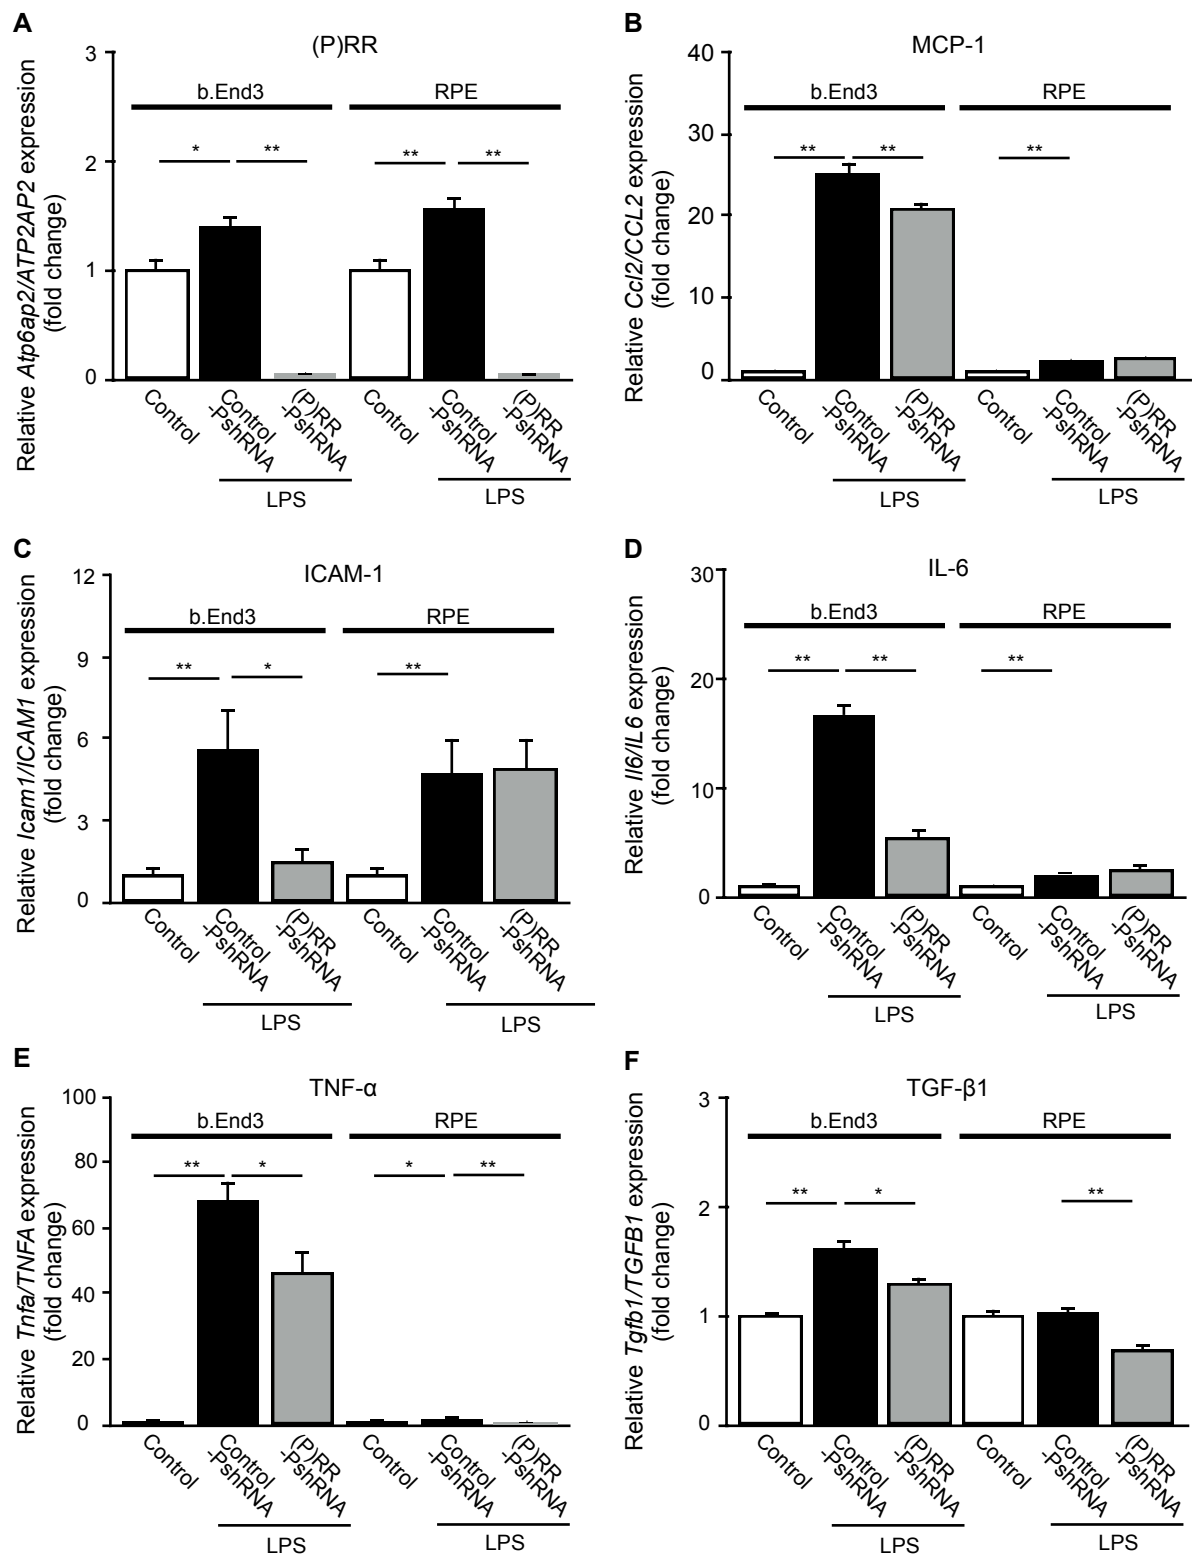

**Figure S3. Blockade of inflammatory responses by (P)RR-PshRNA in LPS-stimulated endothelial cells and RPE cells**

(A-E) Gene expression levels of inflammatory molecules *Atp6ap2/ATP6AP2* (A), *Ccl2/CCL2* (B), *Icam1/ICAM1* (C), *Il6/IL6* (D), *Tnfa/TNFA* (E) and profibrotic cytokine *Tgfb1/TGFB1* (F) in 1 nM control-PshRNA or (P)RR-PshRNA transfected mouse microvascular endothelial cells stimulated with 10 ng/ml LPS for 8 hours and 1 nM control-PshRNA or (P)RR-PshRNA transfected human RPE cells stimulated with 10 ng/ml LPS for 12 hours. \* $p < 0.05$ , \*\* $p < 0.01$  (n = 6).

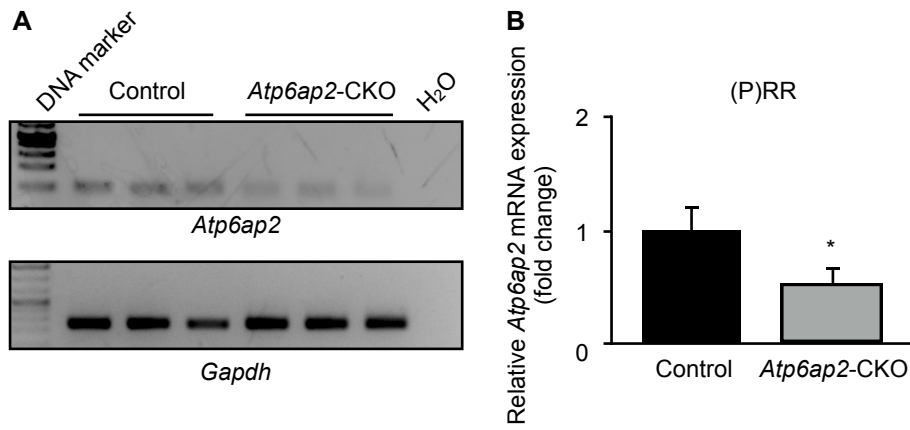

**Figure S4. Gene expression of (P)RR/*Atp6ap2* in the RPE-choroid complex of (P)RR/*Atp6ap2*-CKO mice**

(A) Gene expression analysis of (P)RR/*Atp6ap2* in the RPE-choroid complex of control and (P)RR/*Atp6ap2*-CKO mice. *Gapdh* was used as an internal control. (B) Quantification analysis of the relative expression of (P)RR/*Atp6ap2*. \* $p < 0.05$  (n = 3).

**Table S1. Primer sequences used in quantitative RT-PCR**

| <b>Target gene</b>   | <b>Sequence</b>                                                                       |
|----------------------|---------------------------------------------------------------------------------------|
| Mouse                |                                                                                       |
| <i>(P)RR/Atp6ap2</i> | forward 5'- CCTCATTAGGAAGACAAGGACTATCC -3'<br>reverse 5'- GGGTTCTTCGCTTGTTTTGC -3'    |
| <i>Ccl2</i>          | forward 5'- TTGGCTCAGCCAGATGCA -3'<br>reverse 5'- CCTACTCATTGGGATCATCTTGC -3'         |
| <i>Icam1</i>         | forward 5'- CCTGTTTCCTGGCTCTGAAG -3'<br>reverse 5'- GTCTGCTGAGACCCCTCTTG -3'          |
| <i>Il6</i>           | forward 5'- CACAGAGGATAACCACTCCCAACA -3'<br>reverse 5'- TCCACGATTTCCCAGAGAAACA -3'    |
| <i>Tnfa</i>          | forward 5'- GGTGCCTATGTCTCAGCCTCTT -3'<br>reverse 5'- CGATCACCCCGAAGTTCAGTA -3'       |
| <i>Emr1</i>          | forward 5'- CTTTGGCTATGGGCTTCCAGTC -3'<br>reverse 5'- GCAAGGAGGACAGAGTTTATCGTG -3'    |
| <i>Tgfb1</i>         | forward 5'- CAGTGGCTGAACCAAGGAGAC -3'<br>reverse 5'- ATCCCGTTGATTTCCACGTG -3'         |
| <i>Acta2</i>         | forward 5'- TCTGTAAGGCCGGCTTTGC -3'<br>reverse 5'- TGTCCCATTCCCACCATCA -3'            |
| <i>Colla1</i>        | forward 5'- TGACTGGAAGAGCGGAGAGT -3'<br>reverse 5'- GACGGCTGAGTAGGGAACAC -3'          |
| <i>Fn1</i>           | forward 5'- GTCAGTGTCTCCAGTGTCTAC -3'<br>reverse 5'- TGGCTTGCTGGCCAATCAGT -3'         |
| <i>Snai1</i>         | forward 5'- CACACGCTGCCTTGTGTCT -3'<br>reverse 5'- GGTCAGCAAAGCACGGTT -3'             |
| <i>Snai2</i>         | forward 5'- CAGCGAACTGGACACACACA -3'<br>reverse 5'- ATAGGGCTGTATGCTCCCGAG -3'         |
| <i>Twist1</i>        | forward 5'- GGACAAGCTGAGCAAGATTCA -3'<br>reverse 5'- CGGAGAAGGCGTAGCTGAG -3'          |
| <i>Gapdh</i>         | forward 5'- AGGTCGGTGTGAACGGATTG -3'<br>reverse 5'- TGTAGACCATGTAGTTGAGGTCA -3'       |
| Human                |                                                                                       |
| <i>(P)RR/ATP6AP2</i> | forward 5'- AGGCAGTGTCATTTTCGTACC -3'<br>reverse 5'- GCCTTCCCTACCATATACTC -3'         |
| <i>CCL2</i>          | forward 5'- CGCCTCCAGCATGAAAGTCT -3'<br>reverse 5'- ATGAAGGTGGCTGCTATG -3'            |
| <i>ICAM1</i>         | forward 5'- GCAAGCTCCCAGTGAAATGCAAAC -3'<br>reverse 5'- TGTCTACTGACCCCAACCCTTGATG -3' |
| <i>IL6</i>           | forward 5'- CCACTCACCTCTTCAGAACG -3'<br>reverse 5'- CATCTTTGGAAGGTTTCAGGTTG -3'       |
| <i>TNFA</i>          | forward 5'- ACTTTGGAGTGATCGGCC -3'<br>reverse 5'- GCTTGAGGGTTTGCTACAAC -3'            |
| <i>TGFB1</i>         | forward 5'- GCCCTGGACACCAACTATTG -3'<br>reverse 5'- CGTGTCCAGGCTCCAAATG -3'           |
| <i>GAPDH</i>         | forward 5'- CCTGGCCAAGGTCATCCATG -3'<br>reverse 5'- GGAAGGCCATGCCAGTGAGC -3'          |
